# Supplementary material for: m6A Demethylase ALKBH5 Restrains PEDV Infection by Regulating GAS6 Expression in Porcine Alveolar Macrophages
Source: MDPI journal article supplement (doi:10.3390/ijms23116191), 2022-05-31
Supplement: s1 [file s1]

Table S1 Primer information for RT-PCR identification

| Primer name      | Sequence of the primer            | Length of products (bp) |
|------------------|-----------------------------------|-------------------------|
| <i>PEDV-M</i>    | F: 5'- TCCCGTTGATGAGGTGAT- 3'     | 551                     |
|                  | R: 5'- AAGCATTGACTGAACGACC- 3'    |                         |
| <i>PDCoV-N</i>   | F: 5'- CCAAACGCAACCCCAACAATCC- 3' | 329                     |
|                  | R: 5'- CTTCTCAGTGTCTGCAGAGCCG- 3' |                         |
| <i>PoRV -VP6</i> | F: 5'- CAAACGGGAGGAATAGGAA- 3'    | 572                     |
|                  | R: 5'- CACTCTTGGGAAACTGAACC- 3'   |                         |
| <i>TGEV-S1</i>   | F: 5'- CCAAACAGCCGTTATTAGTTA- 3'  | 218                     |
|                  | R: 5'- AGTGACACCACCCGTTGT- 3'     |                         |

Table S2 The primer sequence of genes for qPCR

| Gene                          | Sequence of the primer                                                | Length of products (bp) |
|-------------------------------|-----------------------------------------------------------------------|-------------------------|
| <i>Caspase-3</i>              | F: 5'-TGAGCATGGAAACAATACATGG-3'<br>R: 5'-ATTCTTGGCGAAATTCAAAGG-3'     | 198                     |
| <i>Caspase-8</i>              | F: 5'-TCTGCGGACTGGATGTGATT-3'<br>R: 5'-TCTGAGGTTGCTGGTCACAC-3'        | 165                     |
| <i>Caspase-9</i>              | F: 5'-TGCCCATACTTCCCGTCC-3'<br>R: 5'-GGTCCAGGTTACCGTCAG-3'            | 172                     |
| <i>Bcl-2</i>                  | F: 5'-AGGGCATTCACTGACCTGAC-3'<br>R: 5'-CGATCCGACTCACCAATACC-3'        | 193                     |
| <i>Bax</i>                    | F: 5'-TGCCTCAGGATGCATCTACC-3'<br>R: 5'-AAGTAGAAAAGCGCGACCAC-3'        | 199                     |
| <i>IL-6</i>                   | F: 5'-TTCACCTCTCCGGACAAAAC-3'<br>R: 5'-TCTGCCAGTACCTCCTTGCT-3'        | 122                     |
| <i>IL-12</i>                  | F: 5'-CAGGCCCAGGAATGTTCAAA-3'<br>R: 5'-CGTGGCTAGTTCAAGTGGTAAG-3'      | 166                     |
| <i>IFN-<math>\beta</math></i> | F: 5'-GCTAACAAGTGCATCCTCCAAA-3'<br>R: 5'-CCAGGAGCTTCTGACATGCCA-3'     | 124                     |
| <i>IL-1<math>\beta</math></i> | F: 5'-AGGGACATGGAGAAGCGATTT-3'<br>R: 5'-TTCTGCTTGAGAGGTGCTGATG-3'     | 108                     |
| <i>METTL3</i>                 | F: 5'-CCCTATGGGACCCTGACAGA-3'<br>R: 5'-TGACACCAACCAAGCAGTGT-3'        | 250                     |
| <i>METTL14</i>                | F: 5'-GGGAGAGTGTGTTTACGCAAG-3'<br>R: 5'-TGAAGTCCCCGTCTGTGCTA-3'       | 184                     |
| <i>WTAP</i>                   | F: 5'-TCCATTTCGTCTTTCCTCTCCG-3'<br>R: 5'-GCCTCACTCAGTCGAACCTTT-3'     | 130                     |
| <i>FTO</i>                    | F: 5'-GATCTCAATGCCACCCACCA-3'<br>R: 5'-CCACTCAAACCTCGACCTCGT-3'       | 237                     |
| <i>ALKBH5</i>                 | F: 5'-CCCCATCCACATCTTCGAGC-3'<br>R: 5'-CGCATCTAACCTTGTCTTCCTGA-3'     | 250                     |
| <i>YTHDF2</i>                 | F: 5'-ATGGTAACAAGAGACTGGATGCTG-3'<br>R: 5'-ATGTGTCGCGAGTTGGCTATTGG-3' | 229                     |
| <i>GAPDH</i>                  | F: 5'-ACATCATCCCTGCTTCTACTGG-3'<br>R: 5'-CTCGGACGCCTGCTTCAC-3'        | 188                     |

Table S3 Primers for qPCR assay of M gene

| Gene          | Sequence of the primer        | Length of products (bp) |
|---------------|-------------------------------|-------------------------|
| <i>PEDV-M</i> | F: 5'-AGGTCTGCATTCCAGTGCTT-3' | 216                     |
|               | R: 5'-GGACATAGAAAGCCCAACCA-3' |                         |

Table S4 The primer sequence of genes for qPCR

| Gene           | Sequence of the primer                                               | Length of products (bp) |
|----------------|----------------------------------------------------------------------|-------------------------|
| <i>MMP7</i>    | F: 5'-AGGTCTGGCTCATTCGTCTG-3'<br>R: 5'-TCTGGGTTACTTCTCTTTCCGTA-3'    | 135                     |
| <i>CCL2</i>    | F: 5'-GTCACCAGCAGCAAGTGTCC-3'<br>R: 5'-CTTGTCCAGGTGGCTTATGG-3'       | 117                     |
| <i>DPP4</i>    | F: 5'-GTGACGTGCCTTAGCTGTGA-3'<br>R: 5'-ACCAGGGCCAAAACATCTCA-3'       | 105                     |
| <i>CHAC1</i>   | F: 5'-AGCGTTGTGGATTTTCGGGTA-3'<br>R: 5'-ACCACACGACCAGGCATCTT-3'      | 153                     |
| <i>TGFBI</i>   | F: 5'-CTGCGGCAAATCAACAGTCA-3'<br>R: 5'-GTTGATCCACGACTCCCAG-3'        | 129                     |
| <i>SCG2</i>    | F: 5'-ATGCAGCAAACCAAAAGCCT-3'<br>R: 5'-CCGGTTTTCAACATCTGGCA-3'       | 140                     |
| <i>SFTA2</i>   | F: 5'-GGAATGACTTTGCGACTGA-3'<br>R: 5'-CTGATGGAAGGTGGAGGA-3'          | 112                     |
| <i>ID3</i>     | F: 5'-AACCACTGCTACTCGCGTCTCC-3'<br>R: 5'-GAAGGTCGTTTGGTCATTGGAGAT-3' | 219                     |
| <i>TMEM160</i> | F: 5'-GACAGCCTTCCTTTCTGTT-3'<br>R: 5'-CAGCAGGAAGAAGCCATAAGCA-3'      | 112                     |
| <i>GAS6</i>    | F: 5'-CCGAGGGTGTCTGTTCTTC-3'<br>R: 5'-CGCTCAAGCTCCTCAACAGA-3'        | 178                     |
| <i>ACTB</i>    | F: 5'-GGATGACGATATTGCTGCGC-3'<br>R: 5'-AGGGTCAGGATGCCTCTCTT-3'       | 198                     |

Table S5 Primer sequences for MeRIP-qPCR

| Gene        | Sequence of the primer      | Length of products (bp) |
|-------------|-----------------------------|-------------------------|
| <i>GAS6</i> | F: 5'-GACCTCGTCCAGCCCATG-3' | 296                     |
|             | R: 5'-TGGTCCCCGCCAACCA-3'   |                         |

180kDa  
130kDa  
100kDa  
70kDa  
55kDa  
40kDa  
35kDa  
25kDa

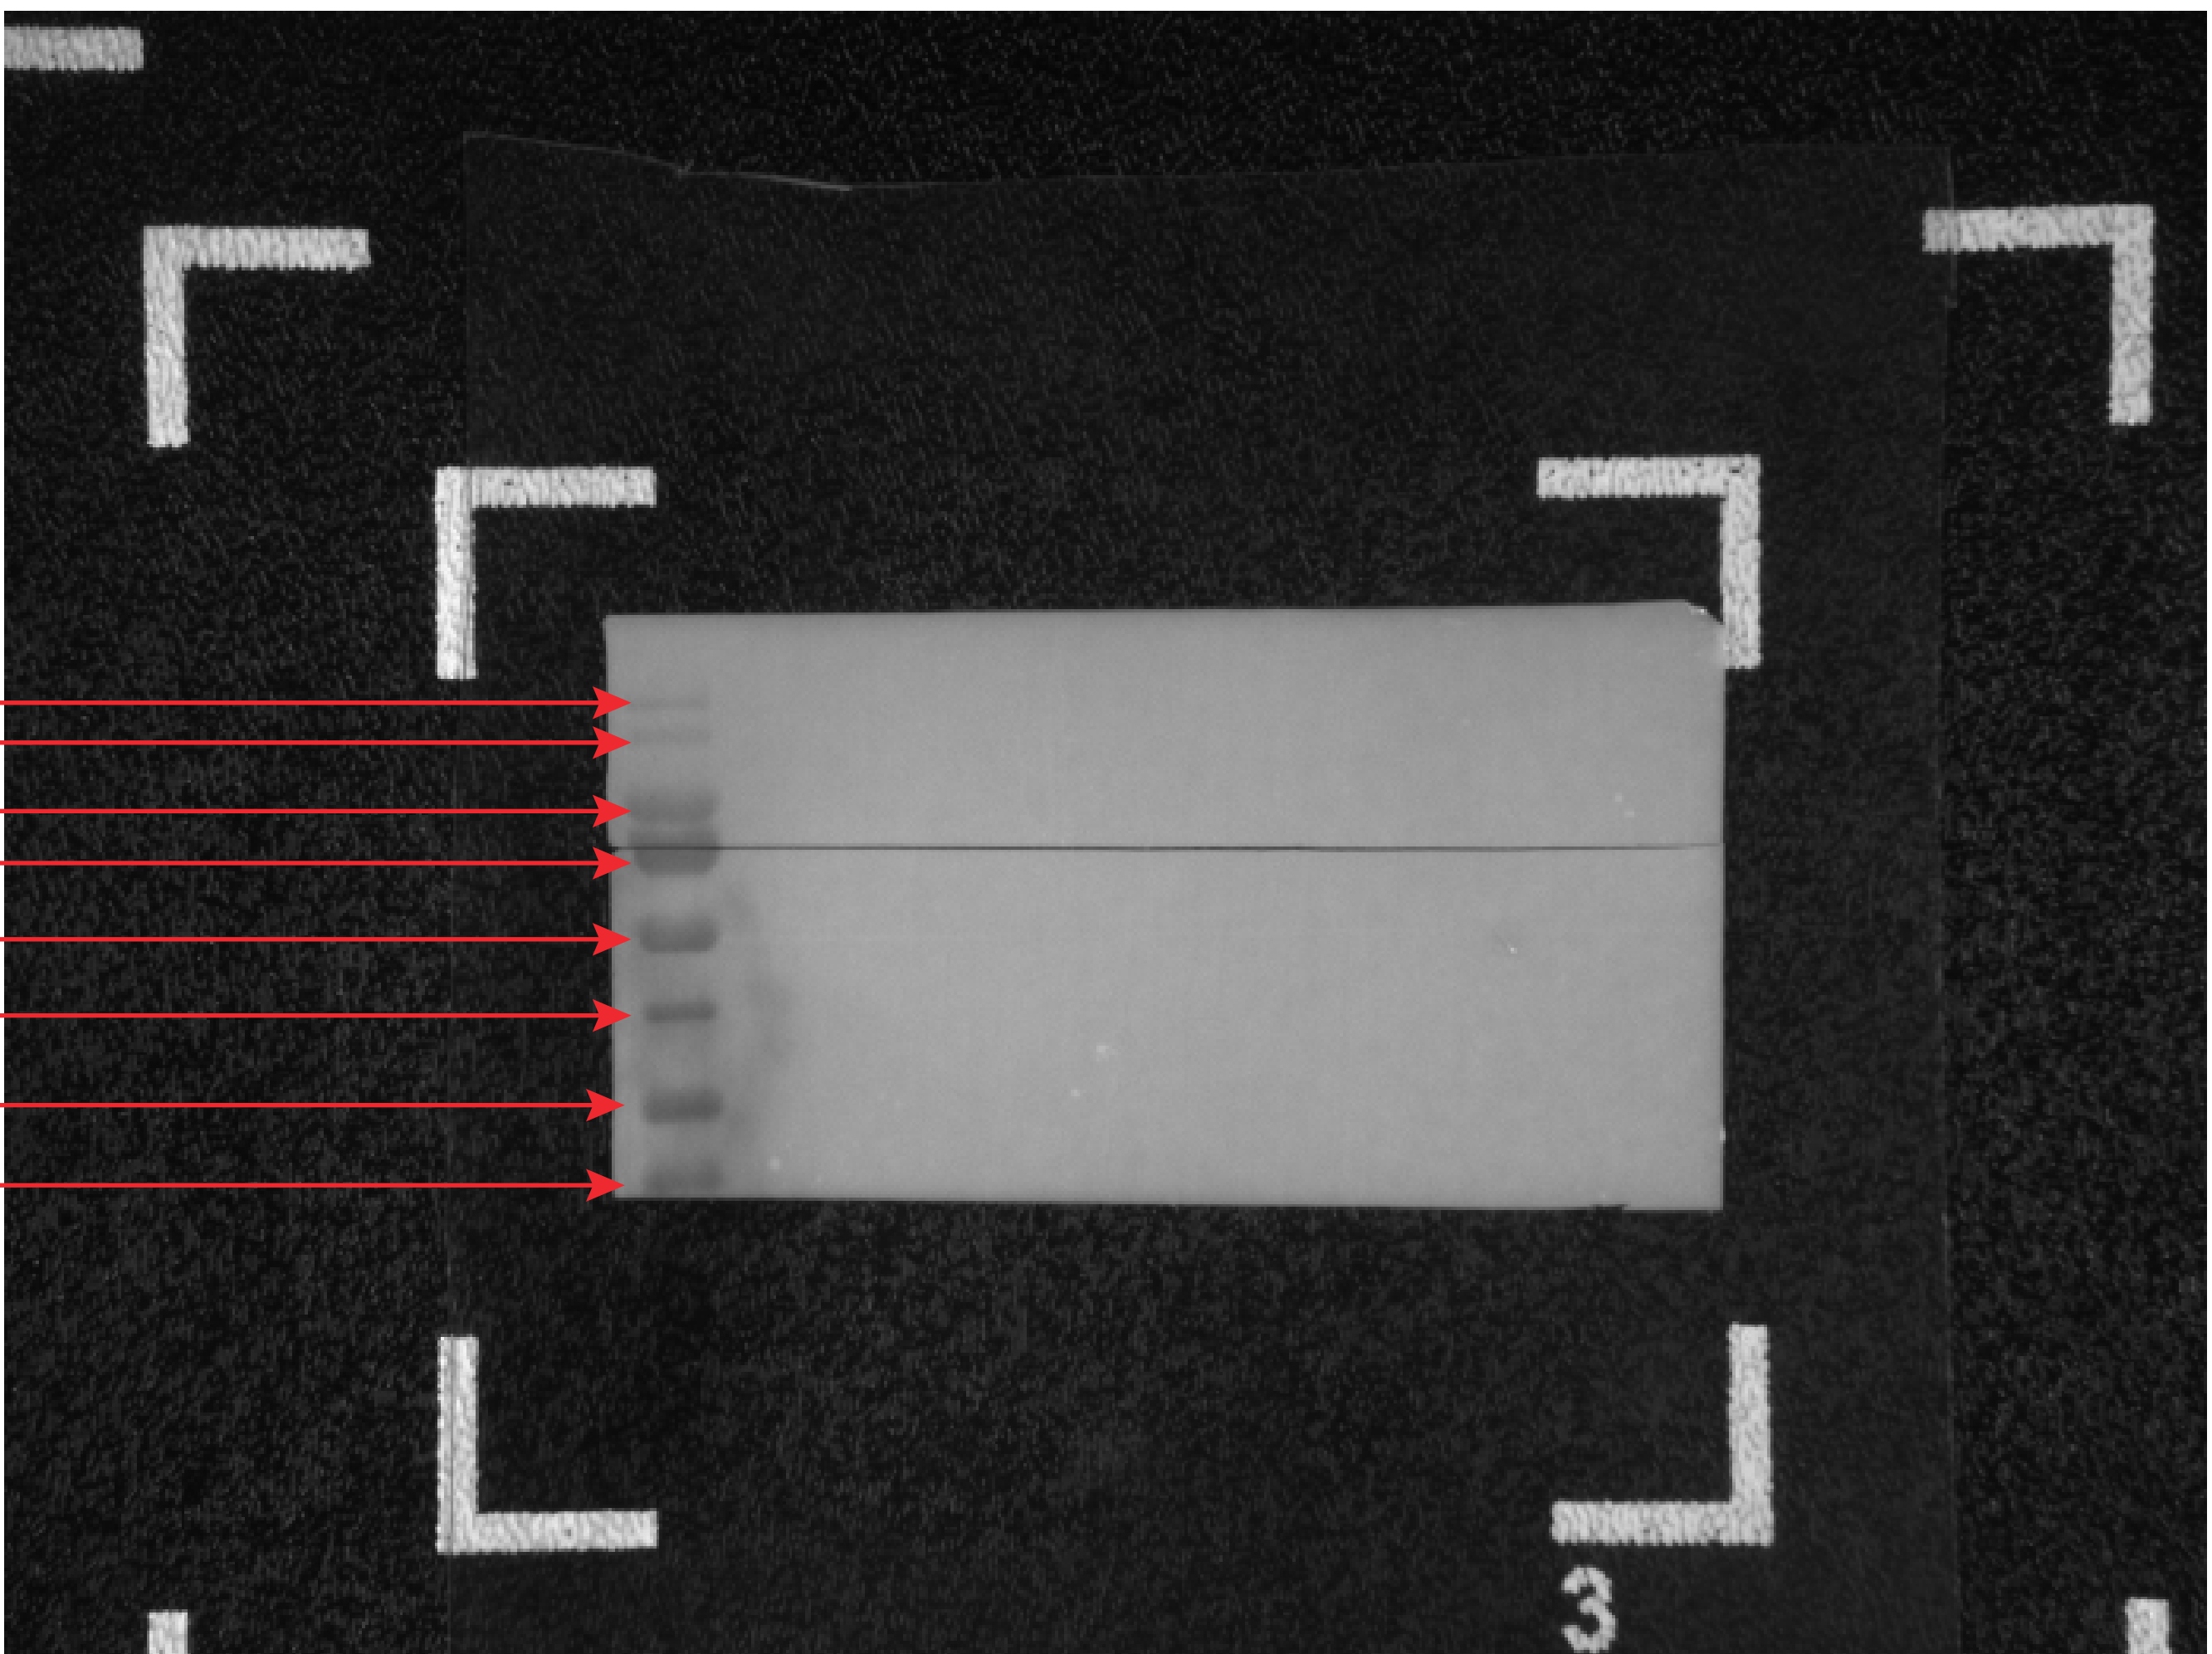

100kDa  
70kDa  
55kDa  
40kDa

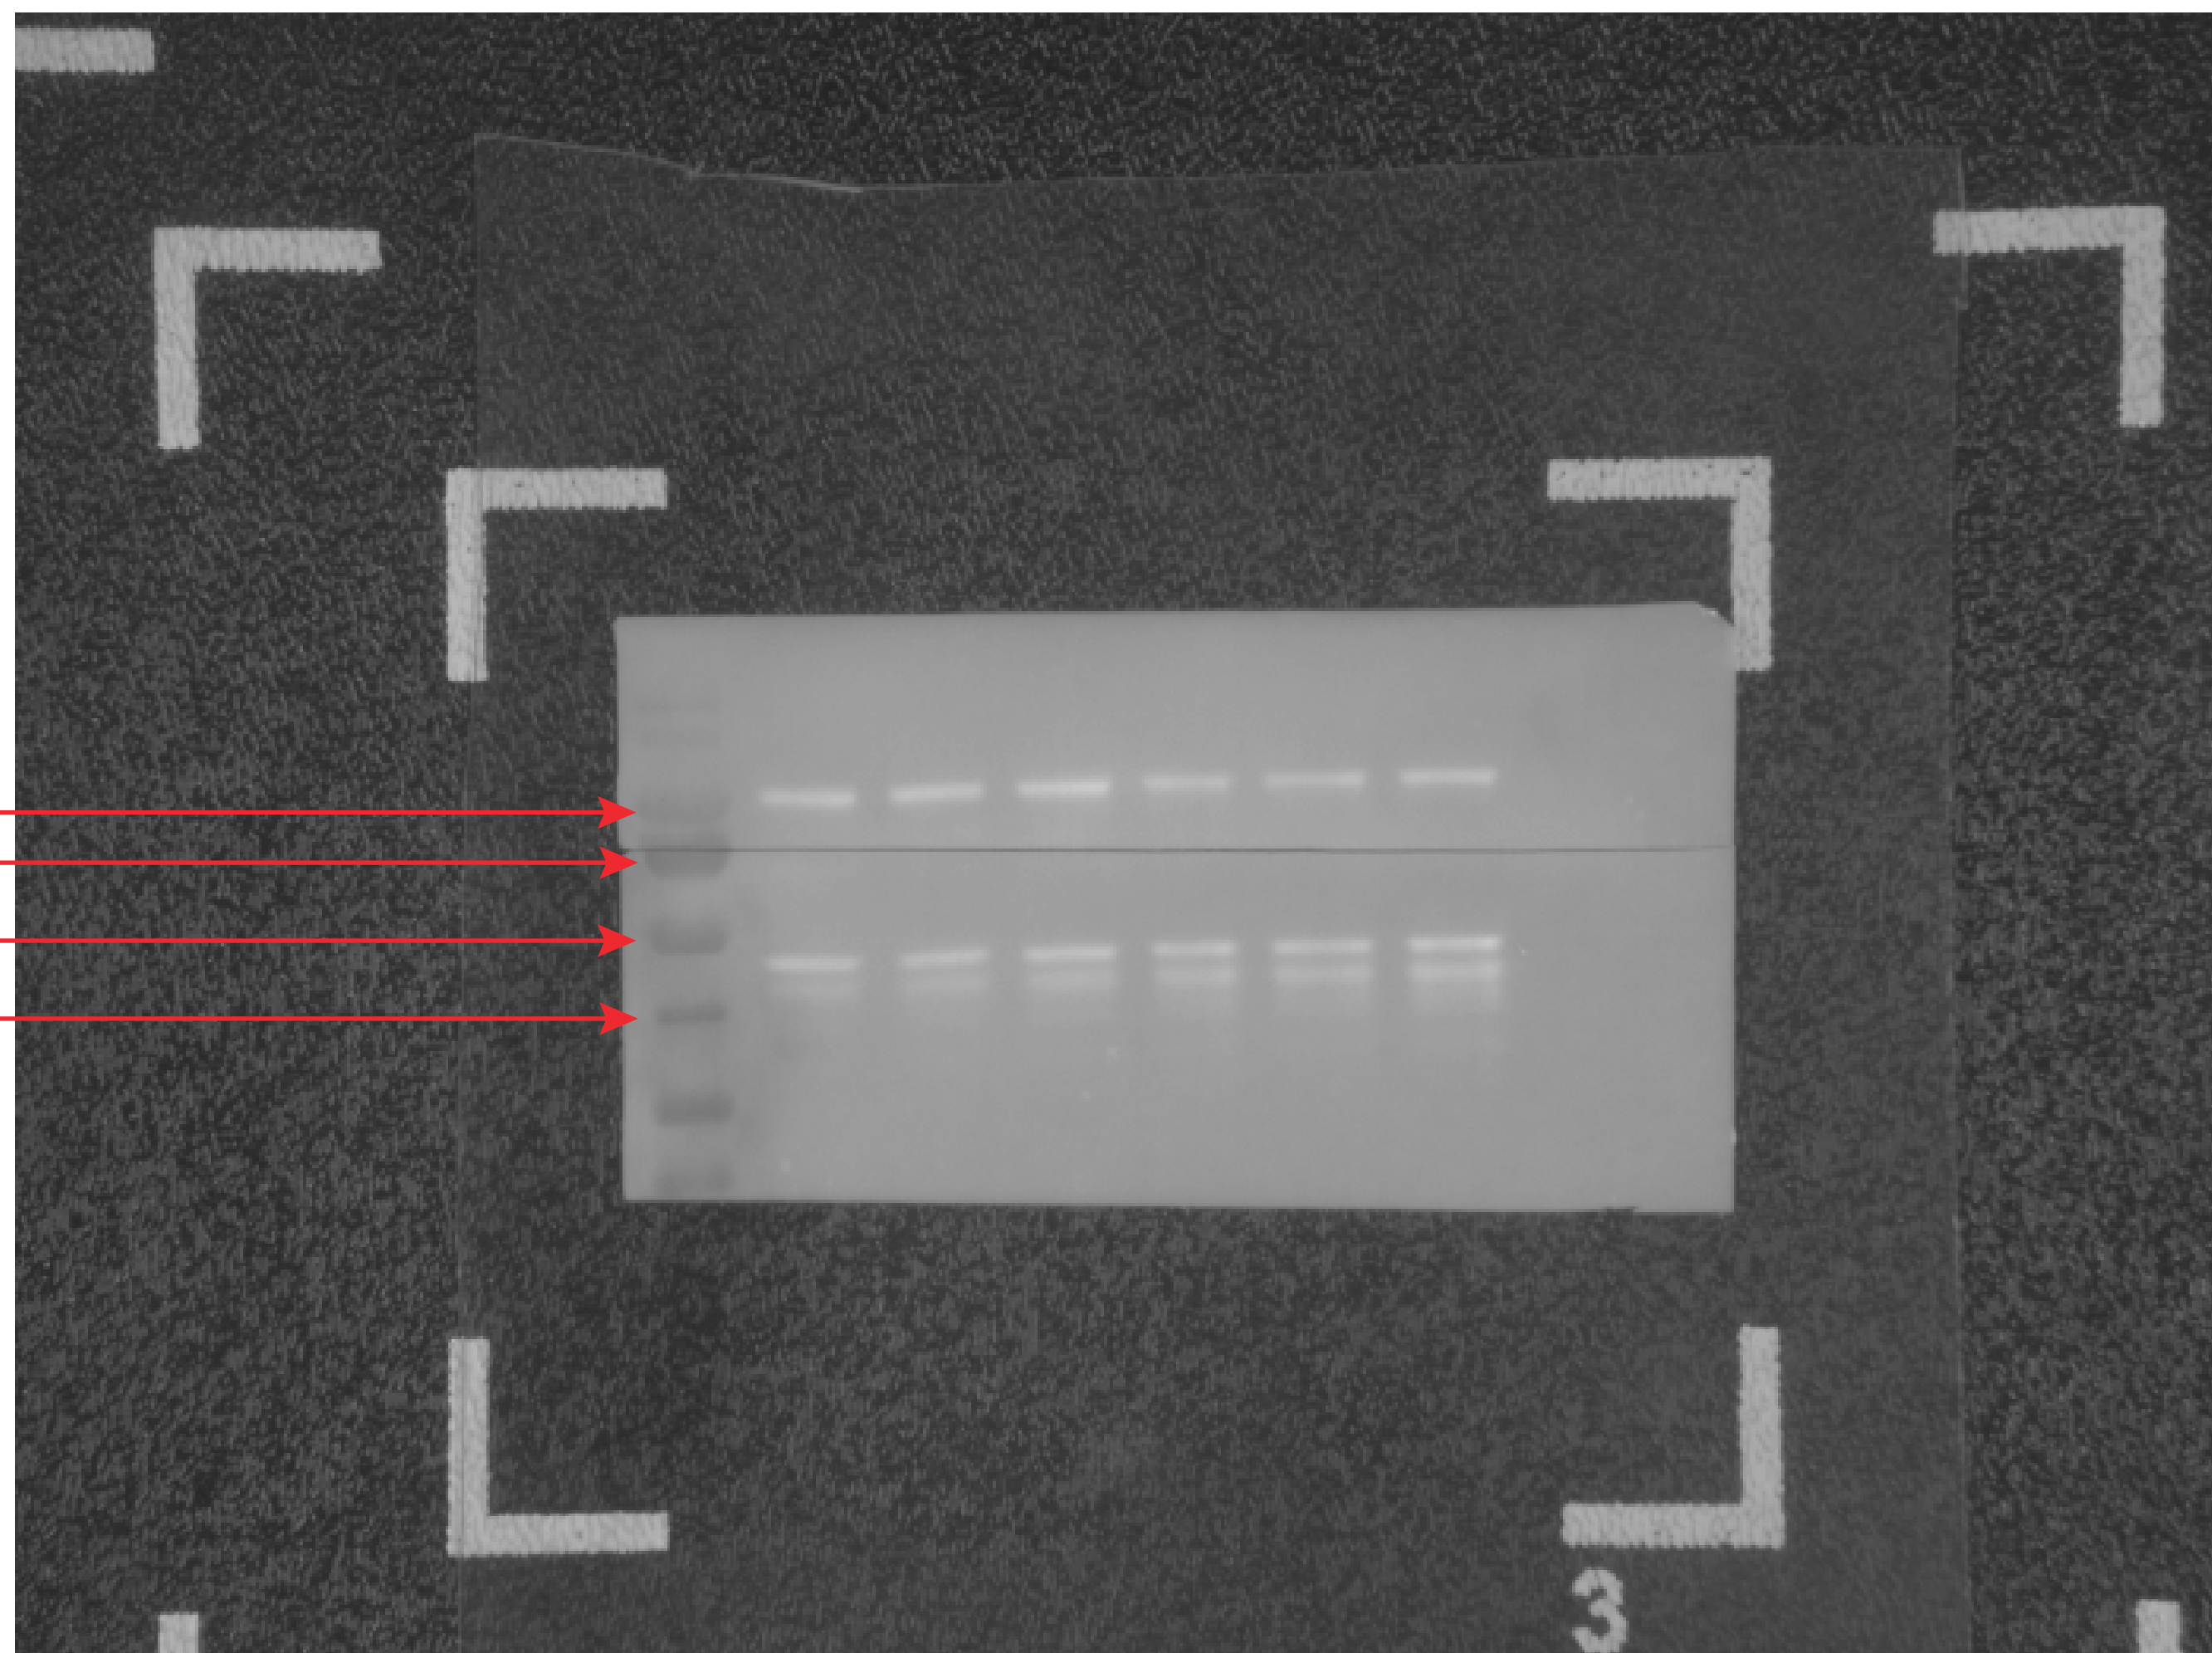

HSP90 (90kDa)  
ALKBH5(35-44kDa)

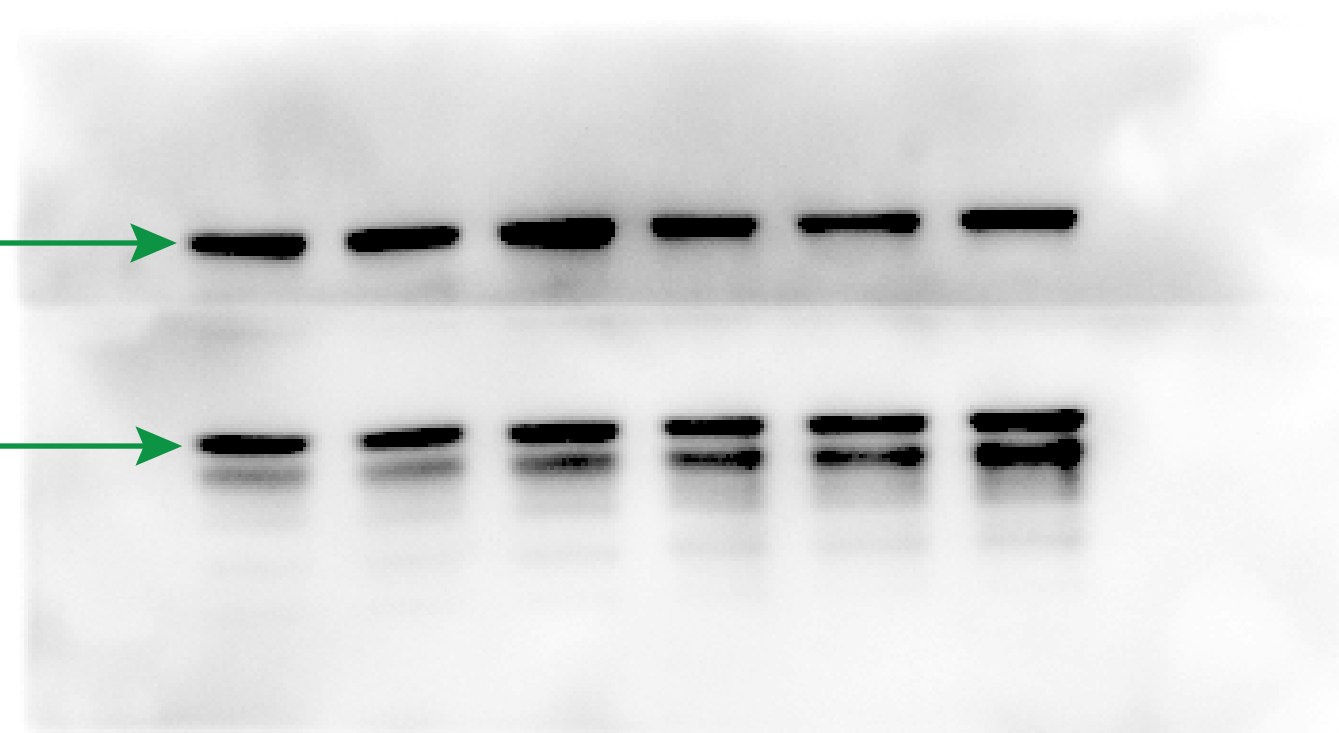

Figure 2f Western blotting for ALKBH5 protein abundance in 3D4/21 cells infected with PEDV for 36 h

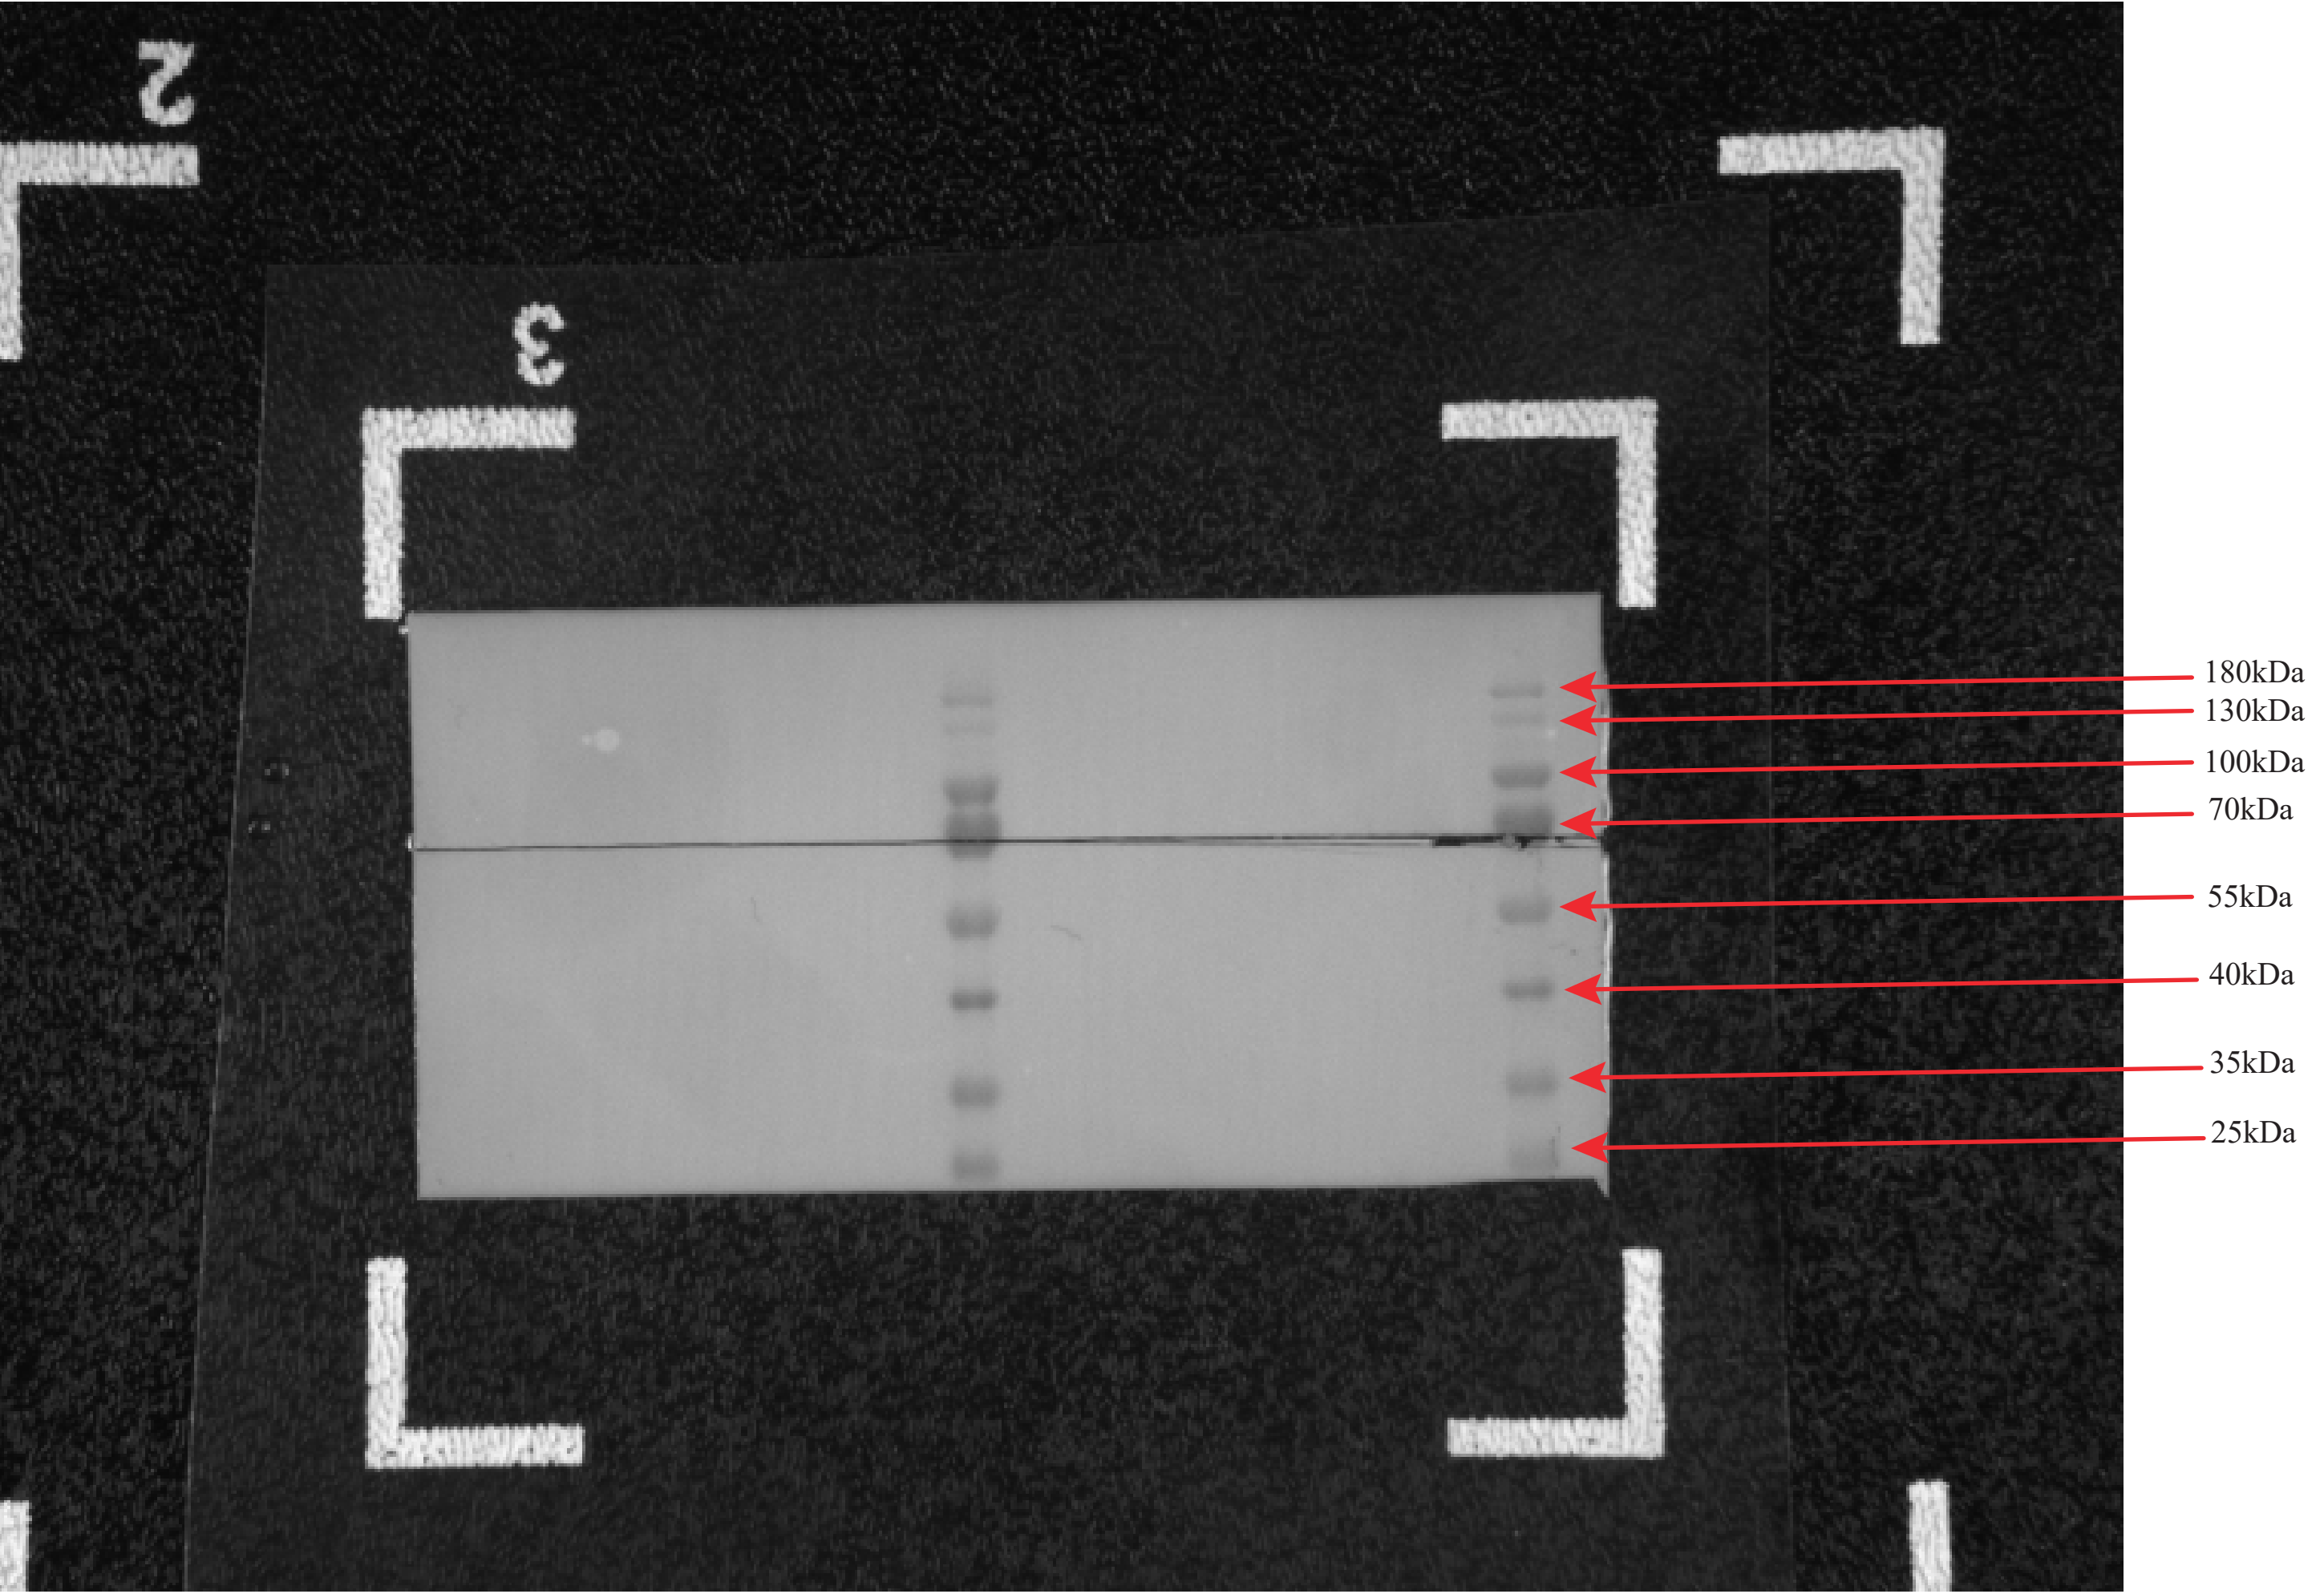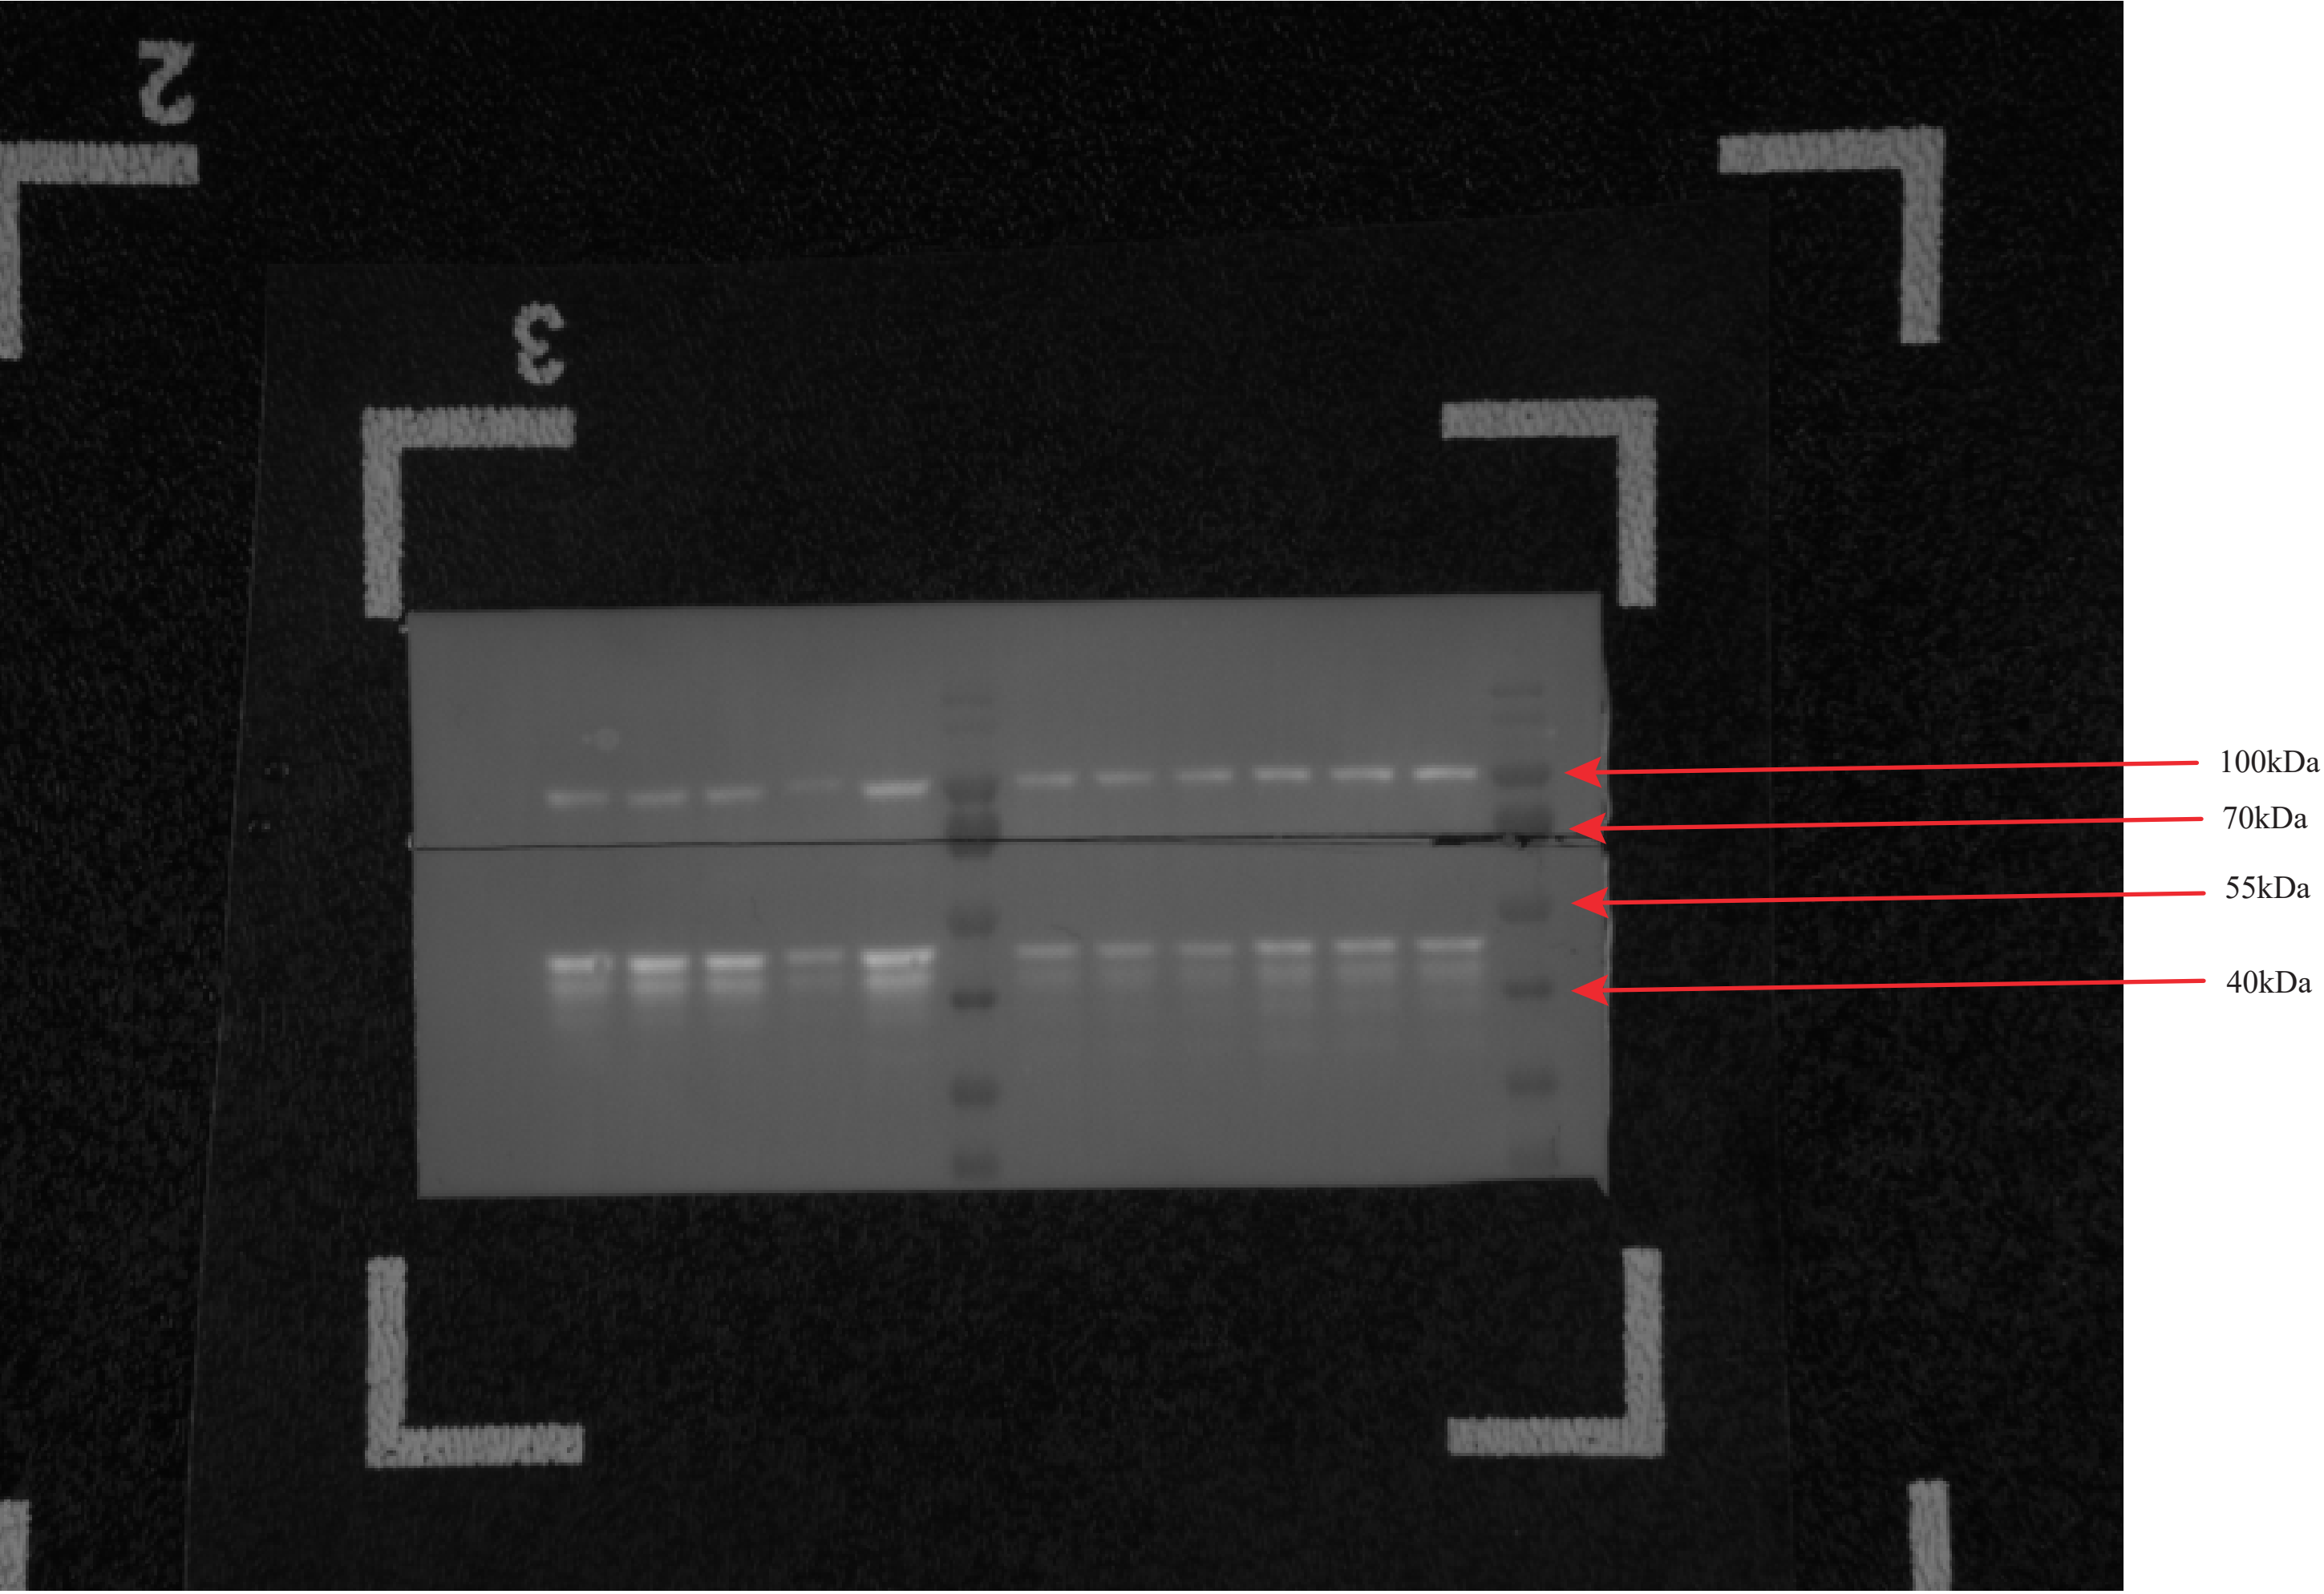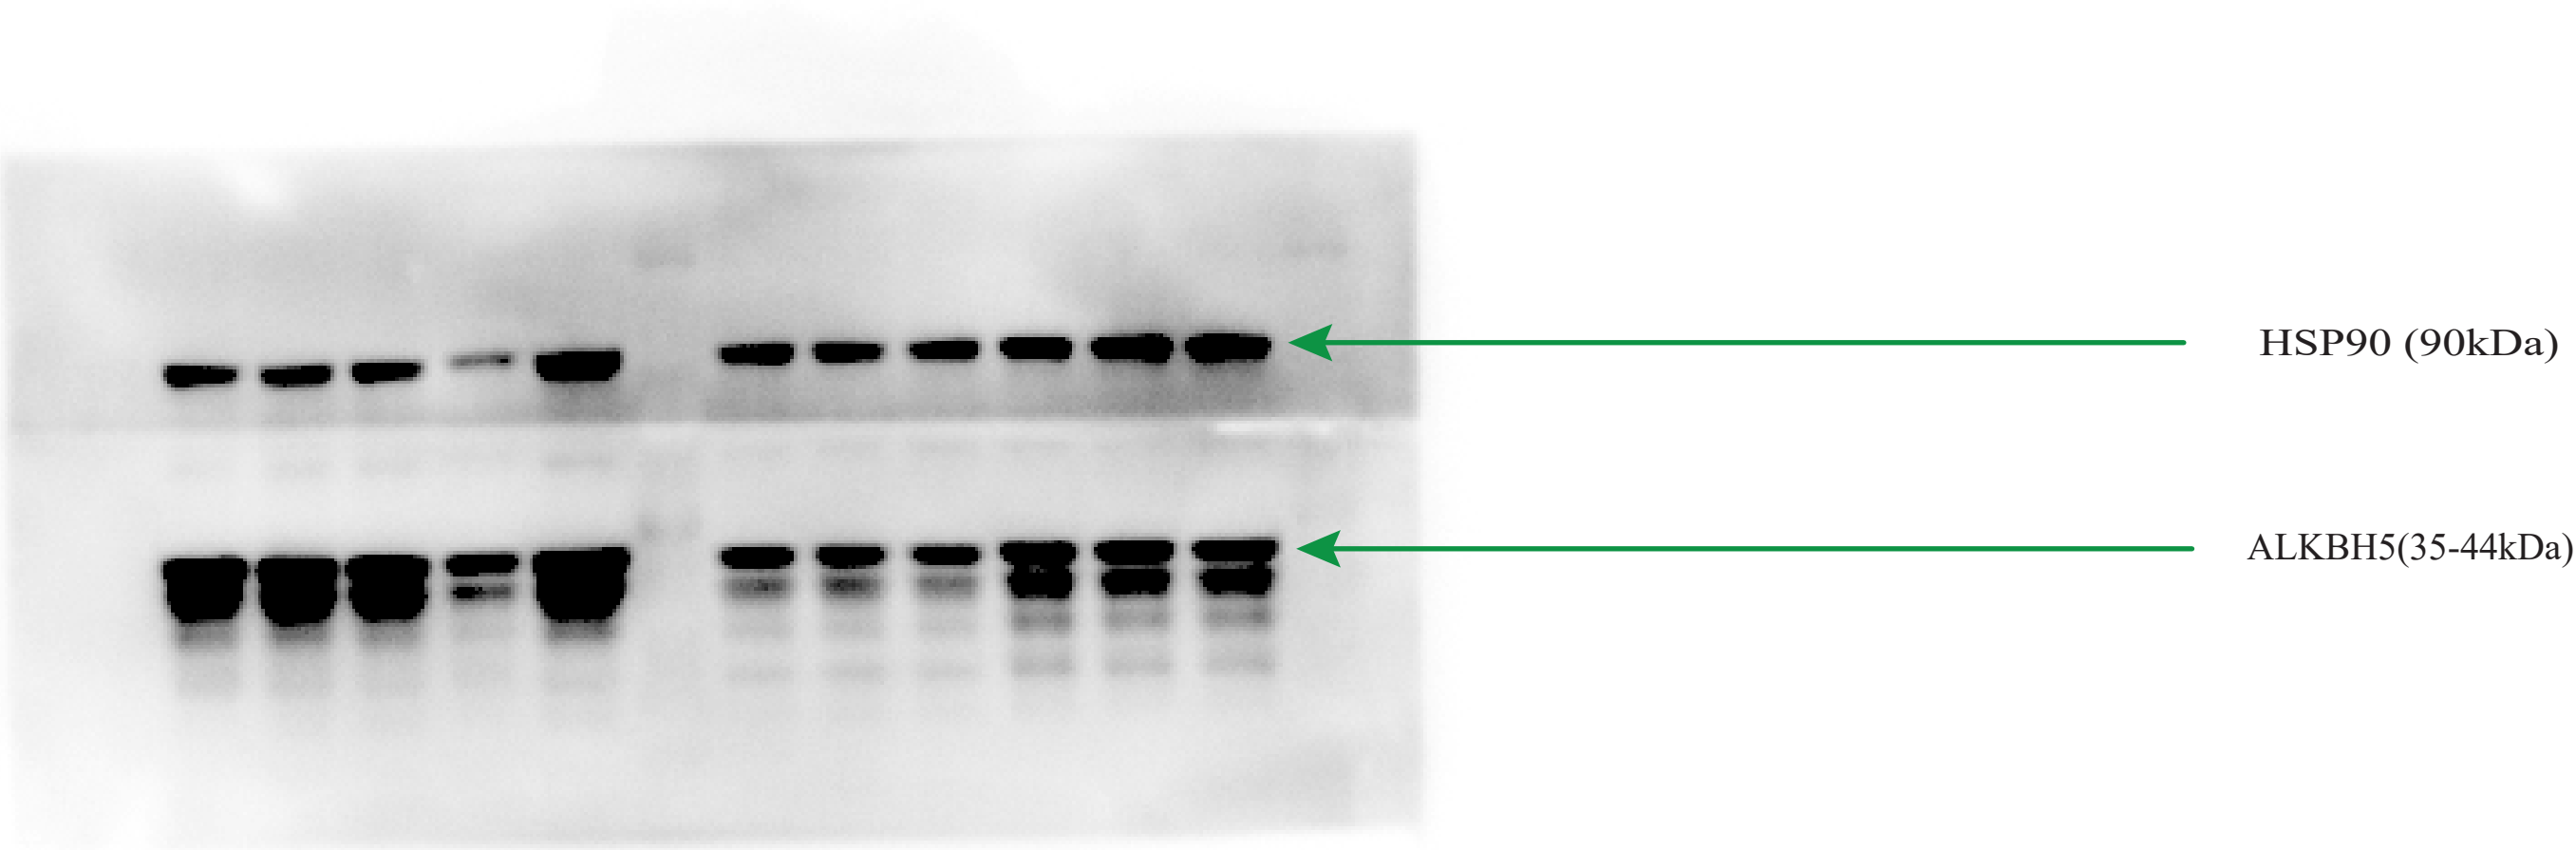

Figure 3c The interference efficiency of ALKBH5 was detected by Western blotting



180kDa  
130kDa  
100kDa  
70kDa  
55kDa  
40kDa  
35kDa

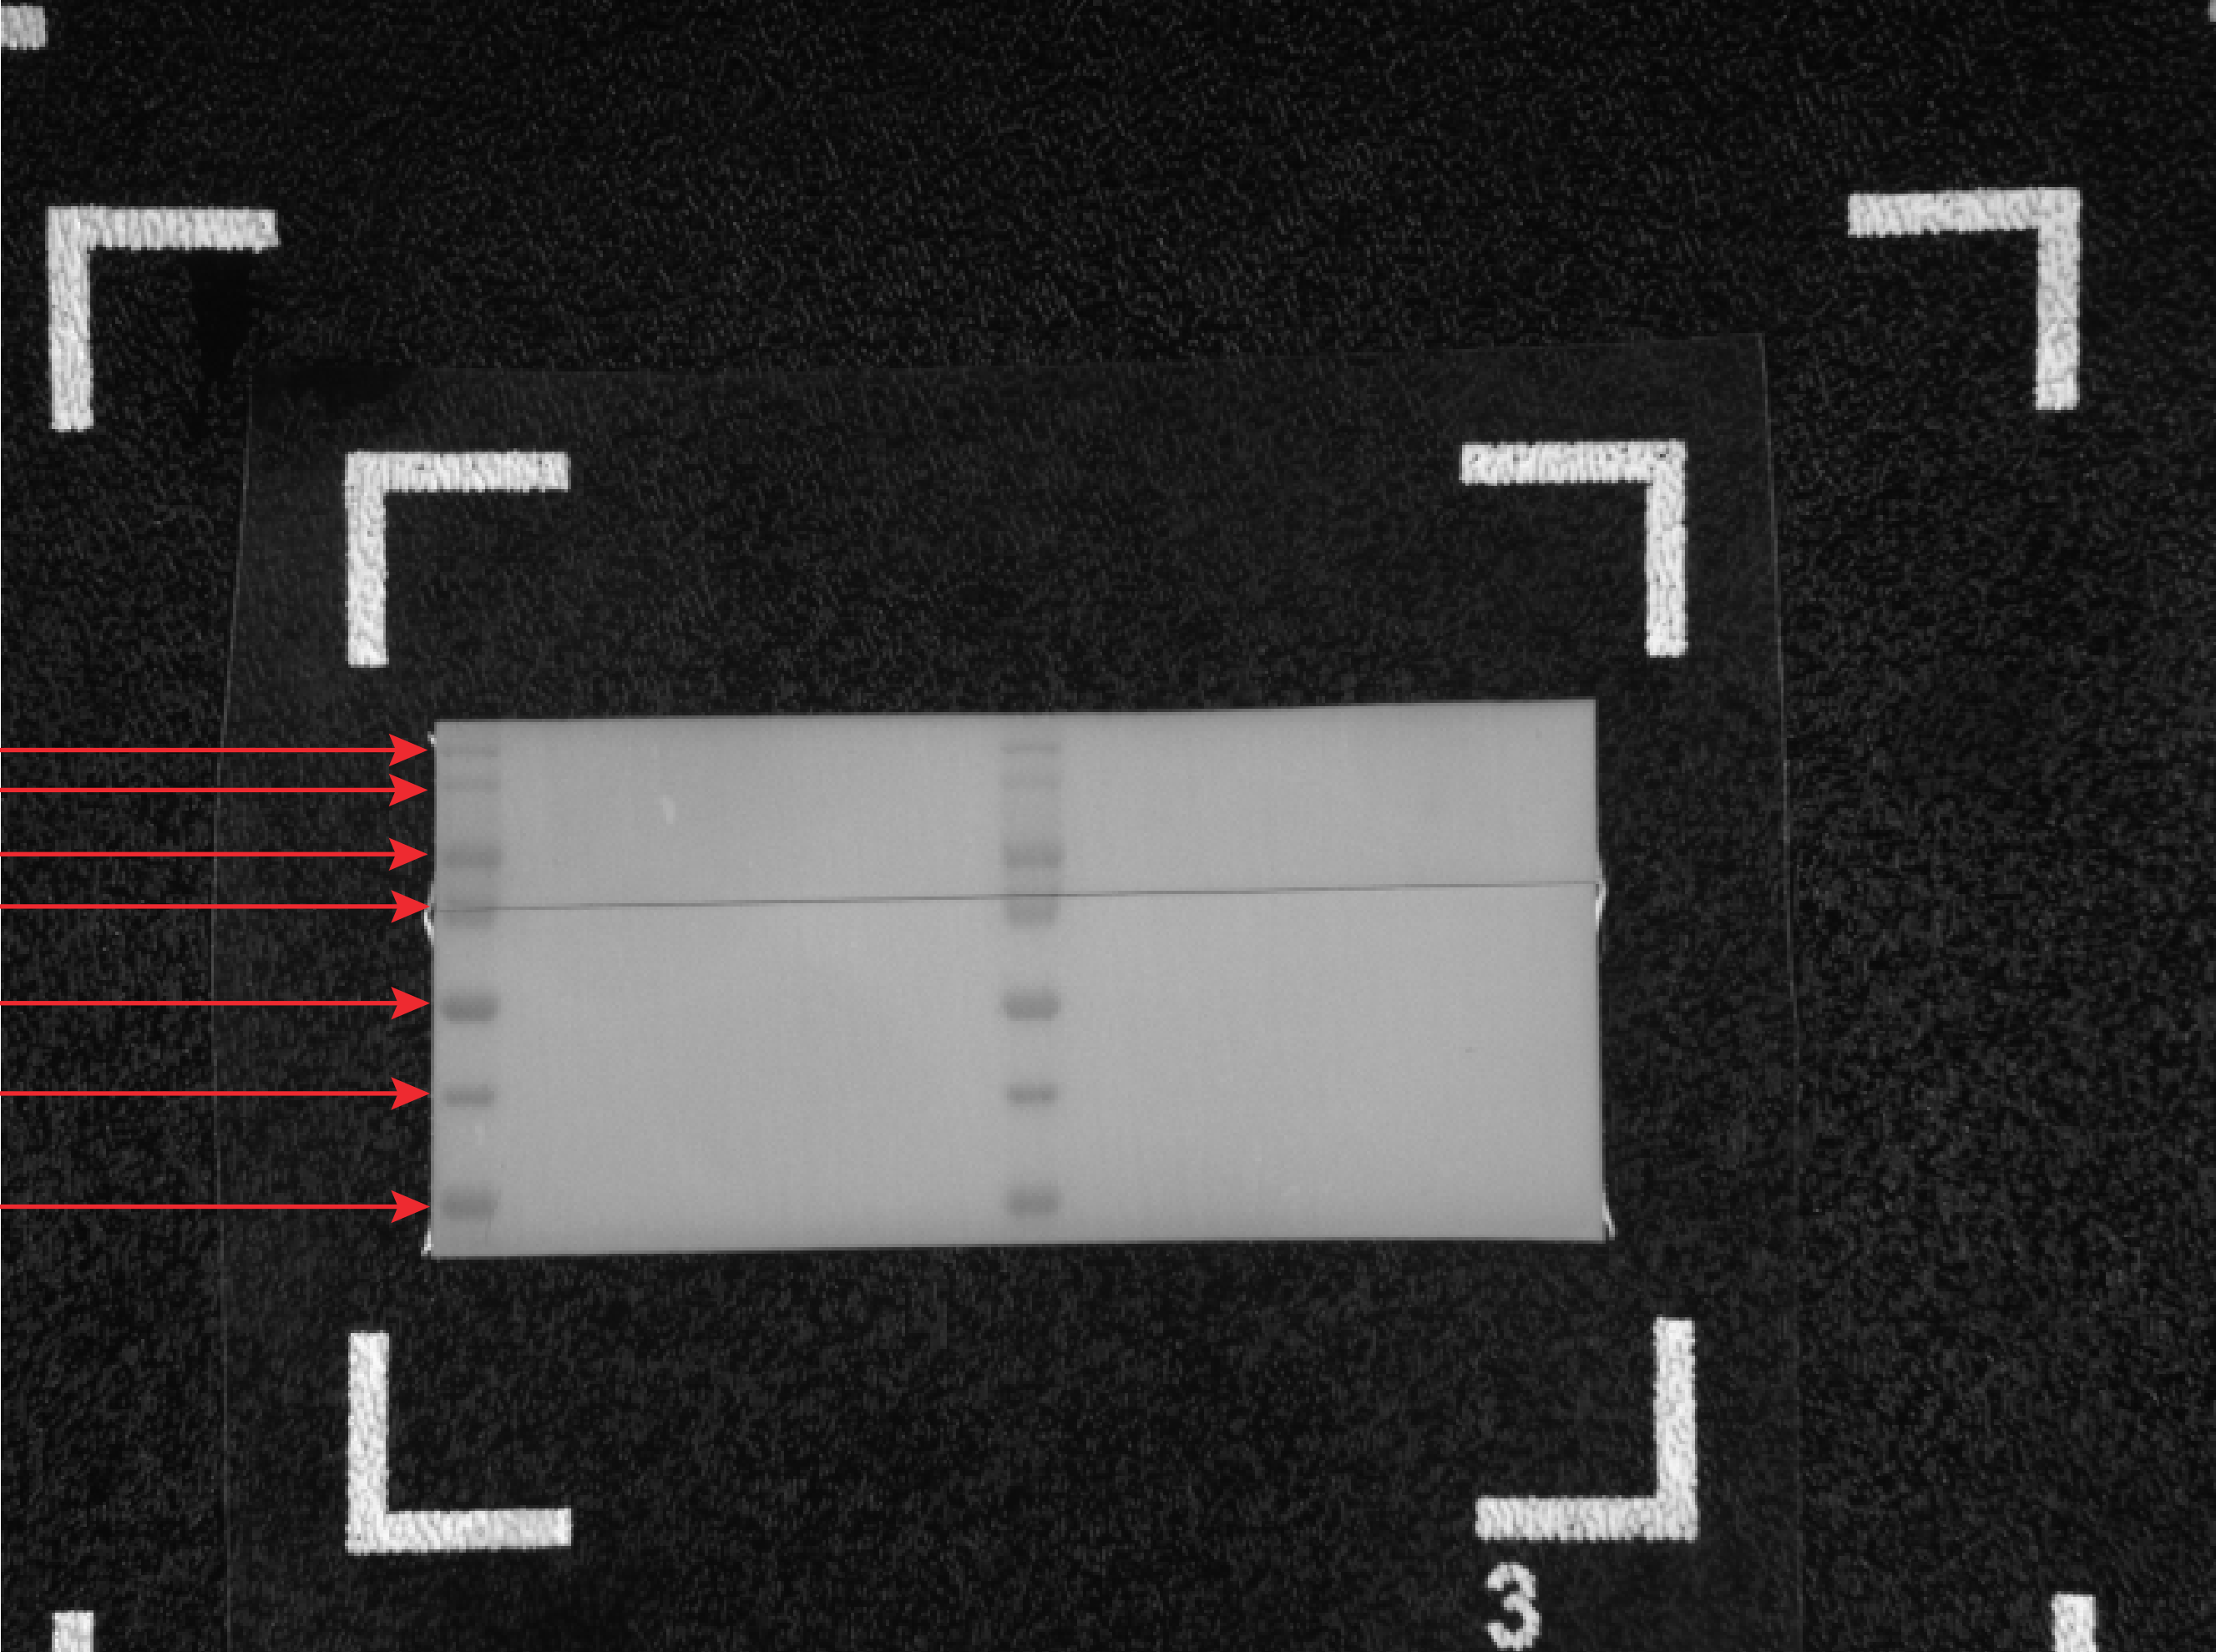

100kDa  
70kDa

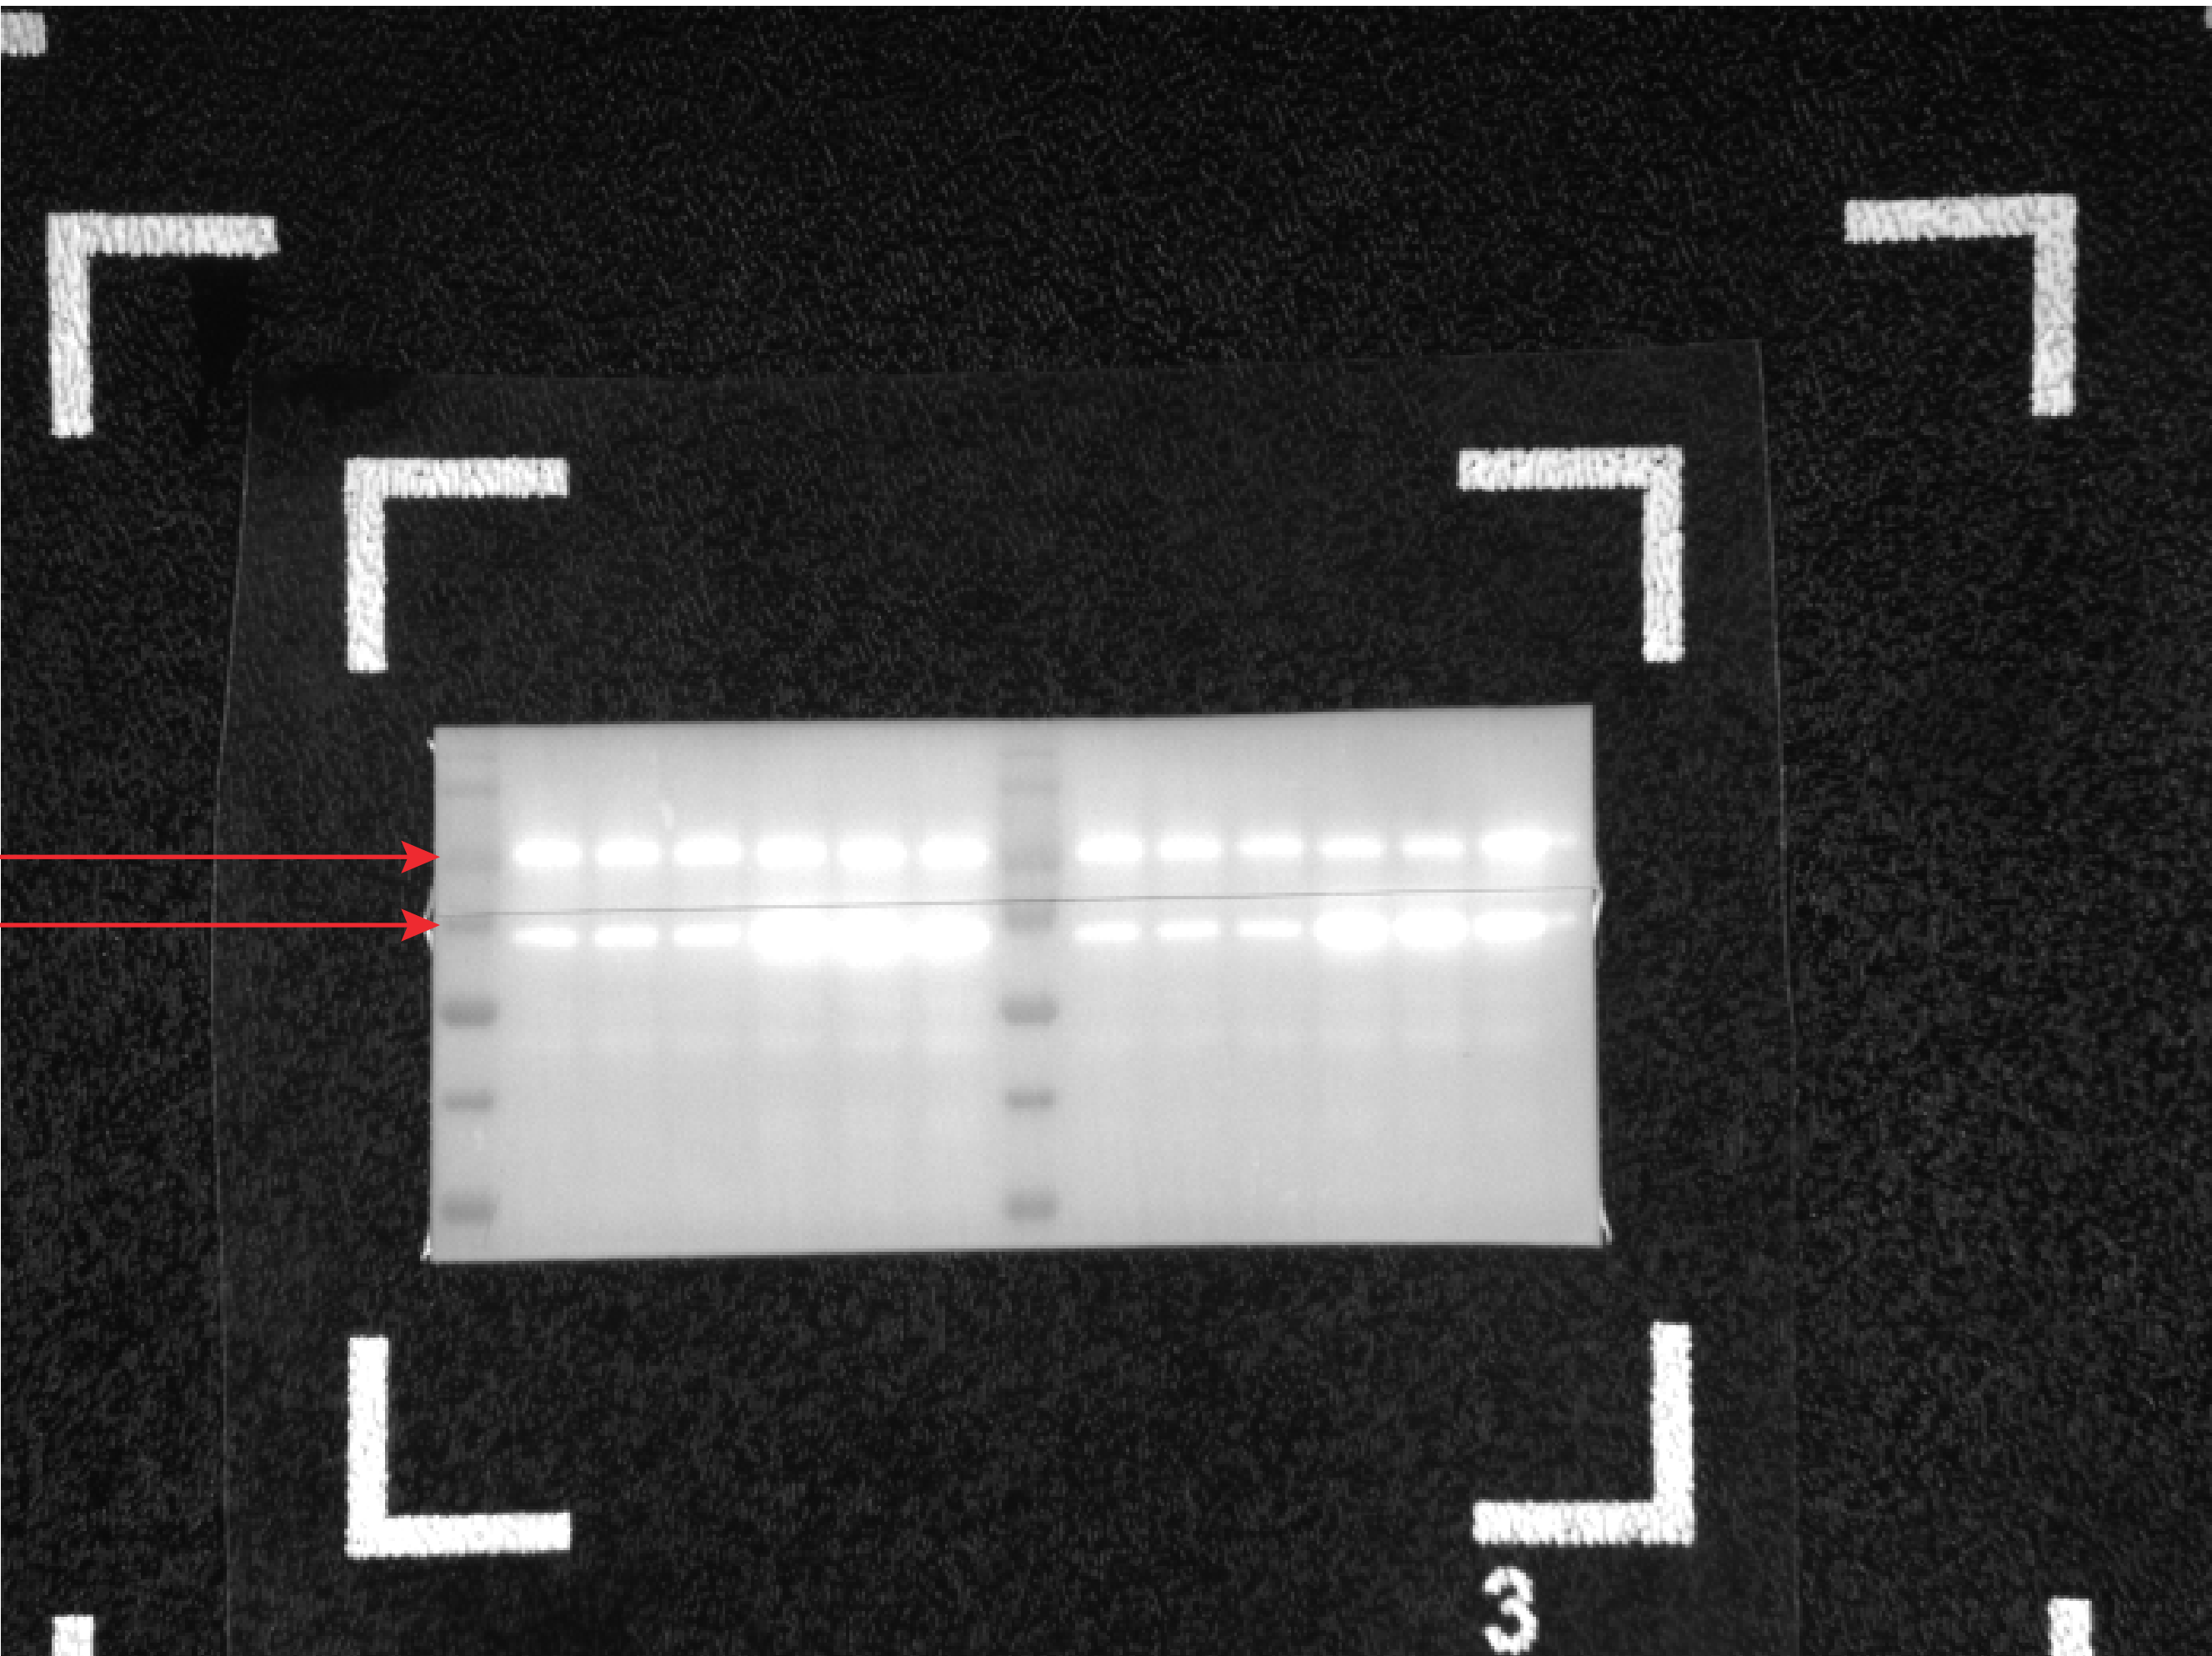

HSP90 (90kDa)  
YTHDF2(62kDa)

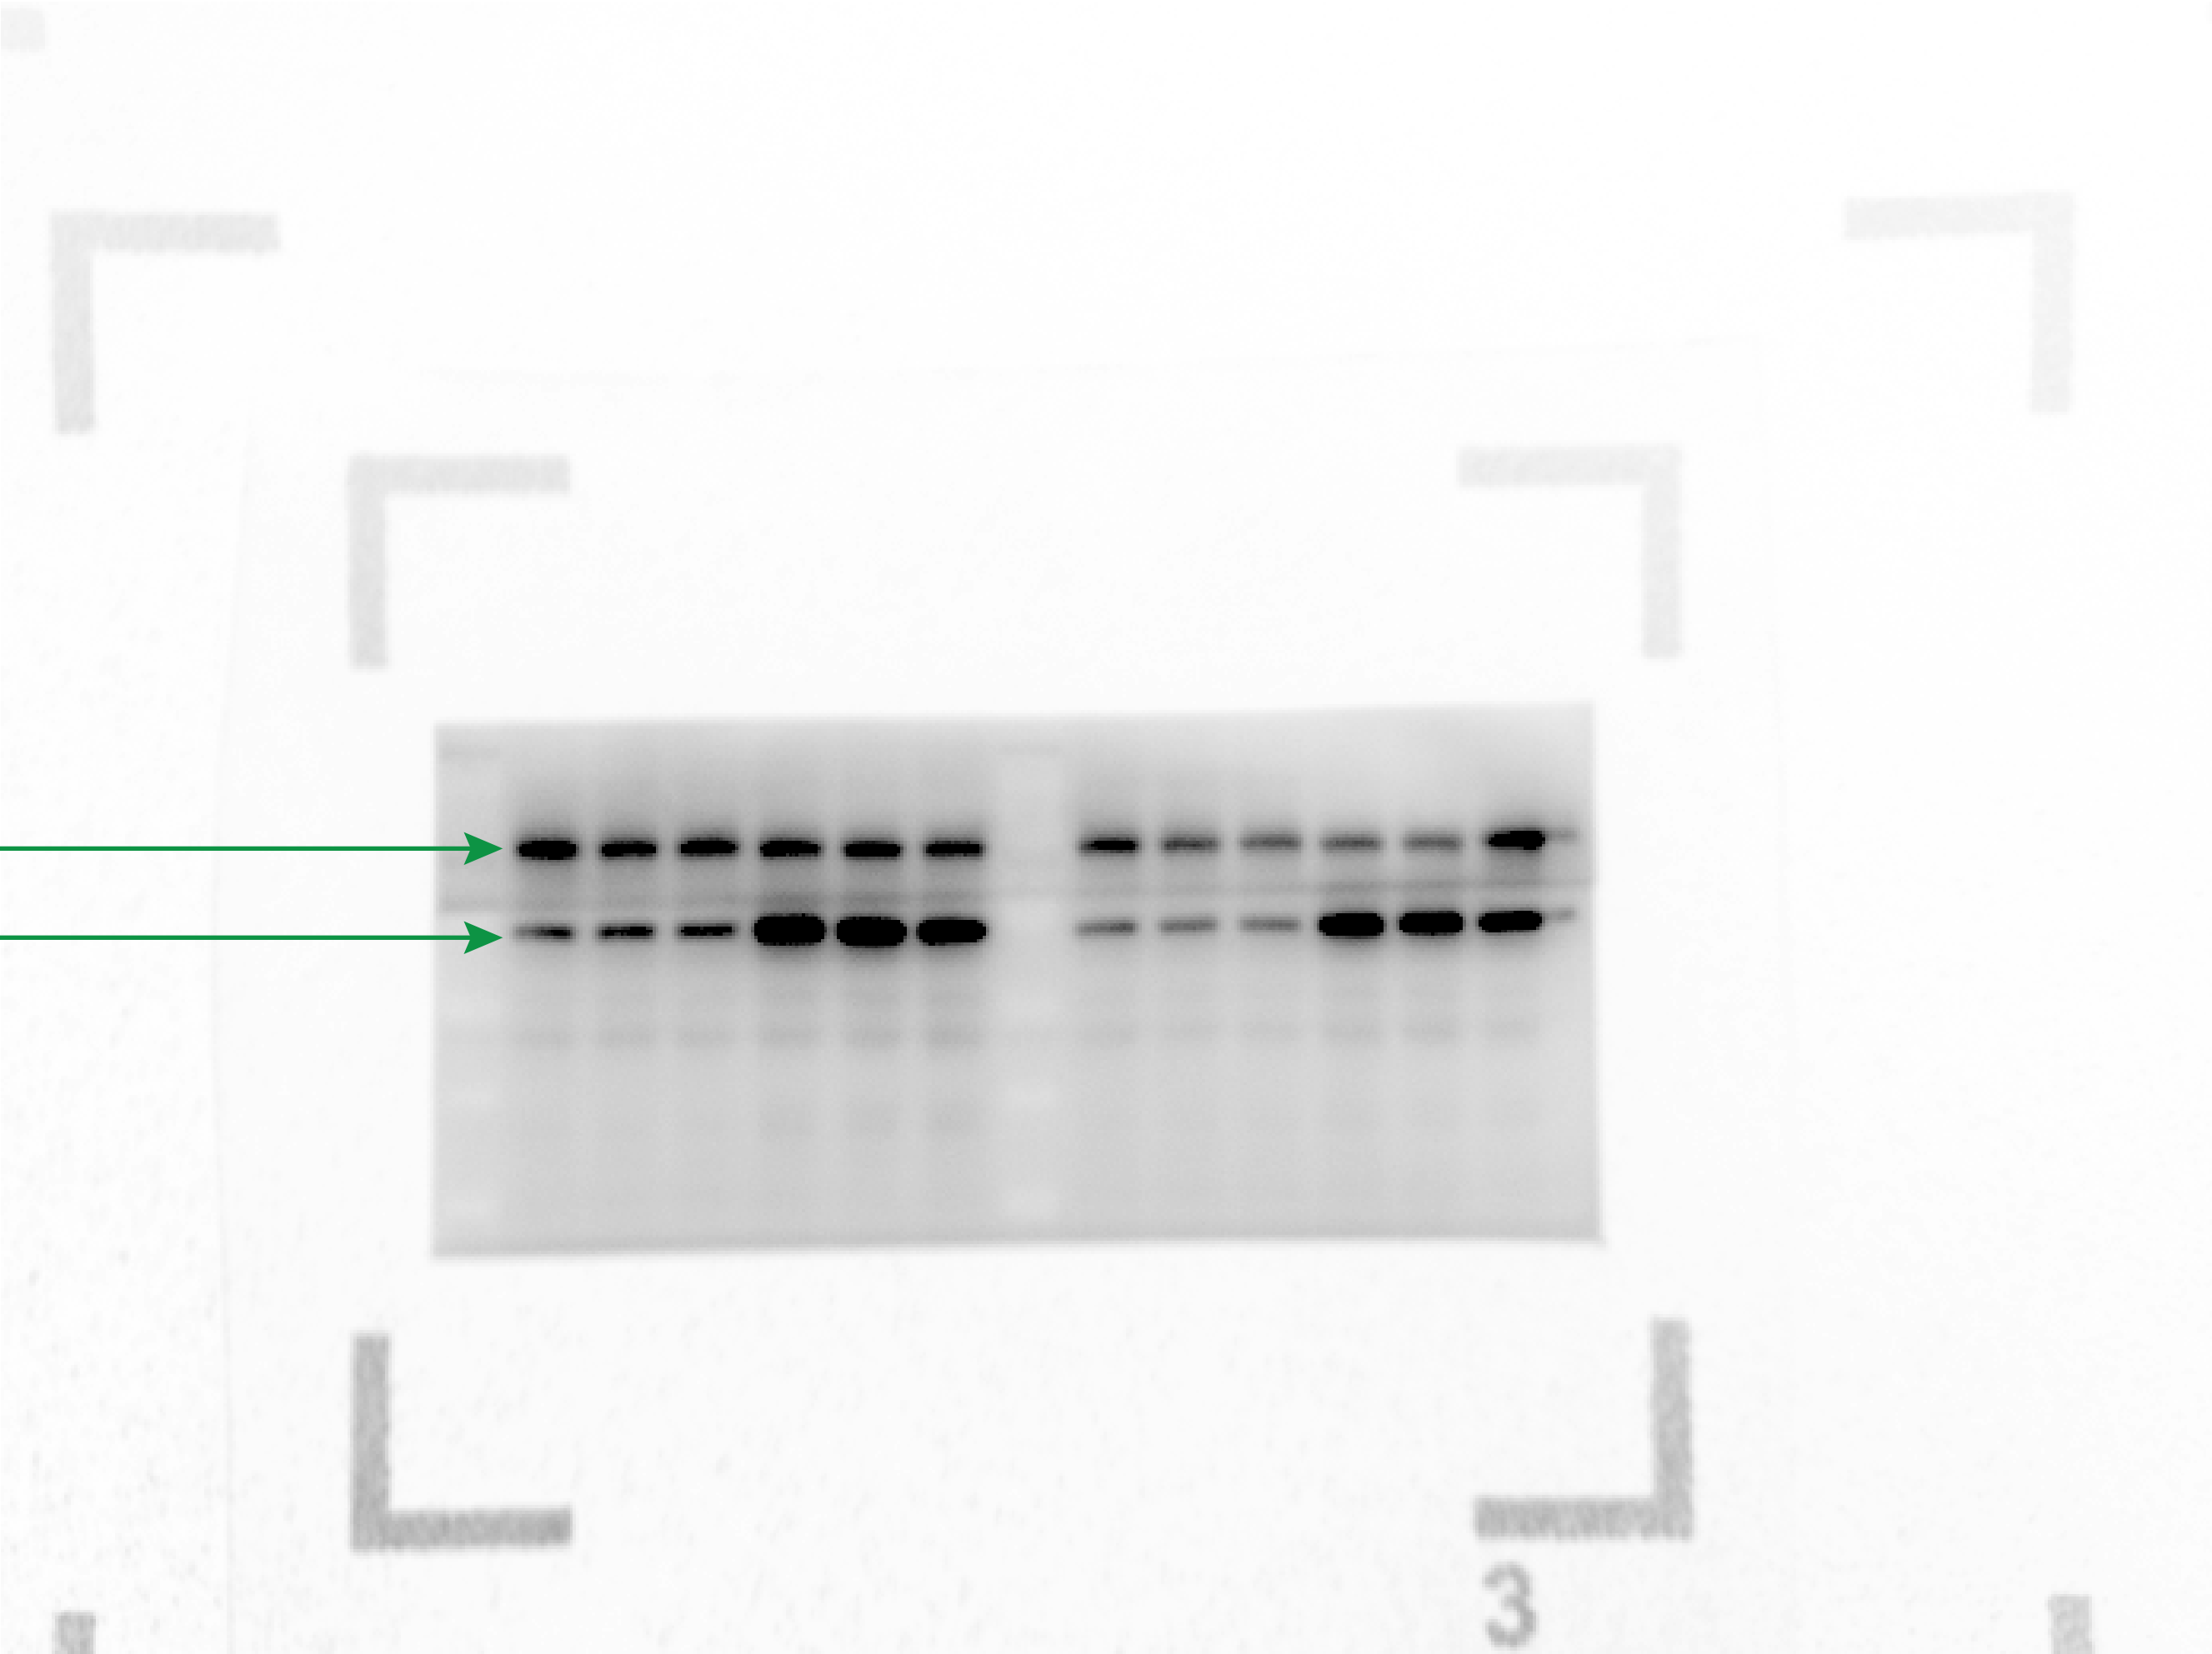

Figure 5i Western blot analysis of *YTHDF2* gene interference efficiency
